# Supplementary material
Source: PubMed Central journal article supplement (PMC7075883)

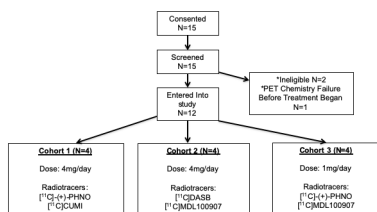

Supplement: 41386_2019_590_MOESM2_ESM.pdf [file 41386_2019_590_MOESM2_ESM.pdf]
